# Supplementary material for: Prot2HG: a database of protein domains mapped to the human genome
Source: Oxford University Press journal article supplement (doi:10.1093/database/baz161), 2020-01-01
Supplement: supplementary_file_for_baz161.pdf [file supplementary_file_for_baz161.pdf]

**Supplementary file for:**

**Prot2HG: a database of protein domains mapped to the human genome**

Stanek David<sup>1</sup>, Bis-Brewer Dana M<sup>2</sup>, Saghira Cima<sup>2</sup>, Danzi Matt C<sup>2</sup>, Lassuthova Petra<sup>1\*</sup>, Seeman Pavel<sup>1</sup> and Zuchner Stephan<sup>2</sup>

<sup>1</sup> Department of Paediatric Neurology, DNA Laboratory, 2nd Faculty of Medicine, Charles University in Prague and University Hospital Motol, Prague, Czech Republic;

<sup>2</sup> Department of Human Genetics and John P. Hussman Institute for Human Genomics, Miller School of Medicine, University of Miami, Miami, FL 33136, USA;

**\* Corresponding author:**

Petra Lassuthova, Department of Paediatric Neurology, DNA Laboratory, 2nd Faculty of Medicine, Charles University in Prague and University Hospital Motol, Prague, Czech Republic; [petra.lassuthova@fnmotol.cz](mailto:petra.lassuthova@fnmotol.cz), phone: +420 224 436 789, fax: +420 224 435 820

## Supplementary file Prot2HG

### Content:

|                                                        |     |
|--------------------------------------------------------|-----|
| Table 1: Database schema of prot2hg                    | p.2 |
| Figure 1: Overview of prot2hg homepage                 | p.3 |
| Table 2: Number of variants in the groups              | p.5 |
| Table 3: Results of Chi-square test of independence    | p.6 |
| Table 4: Testing data / 60 causal pathogenic mutations | p.8 |

Table 1: Database schema of prot2hg

|               |                                                                            |
|---------------|----------------------------------------------------------------------------|
| Id            | identification number of each line                                         |
| Gene          | the name of gene listed in RefSeq                                          |
| Protein_ID    | RefSeq identifier of protein                                               |
| Gene_ID       | RefSeq identifier of gene which is translated into product with Protein_ID |
| Strand        | the strand of the DNA, where gene is located [+ / -]                       |
| Type          | type of protein domain [Region / Site]                                     |
| Feature_name  | name of the domain                                                         |
| Prot_start    | starting posititon of domain in protein sequence                           |
| Prot_end      | ending posititon of domain in protein sequence                             |
| Cds_start     | starting posititon of domain in cDNA of gene                               |
| Cds_end       | ending posititon of domain in cDNA of gene                                 |
| Cds_length    | the length of domain in bp                                                 |
| Rev_trans_map | score, describing the quality of reverse translation [0                    |
| Chr_Start     | starting posititon of domain in chromosomal DNA                            |
| Chr_End       | ending posititon of domain in chromosomal DNA                              |
| Note          | the commentary about domain listed in NCBI                                 |
| CDD           | Conserved domain database identification                                   |
| Chrom         | chromosome, in “chr_” format                                               |

## Supplementary file Prot2HG

Figure 1: Overview of prot2hg homepage.

User enters variants into input textbox, after submitting the query are all annotated variants shown in table with export options and with available search

The screenshot displays the prot2hg.com website interface. At the top, there is a navigation bar with links for Home, Database download, About, and Contact. Below this is an input area containing a text box with five variant coordinates: chr9:138678172, chrX:153296882, chrX:153296882, chrX:153296354, and chr5:88027590. A red 'Submit' button is positioned to the right of the text box. Below the input area, the page is divided into three sections: 'Input textbox', 'Results of the query', and 'Search the results'. The 'Results of the query' section contains a table with columns for #, Gene, Protein ID, Gene ID, Strand, Feature type, Feature name, Feature length, Chromosome, Chr start, Chr end, Note, and CDD. The table lists five entries, including three DNA binding sites on chrX and two regions on chr11 and chr2. Above the table, there are 'Export options' (Copy, CSV) and a search bar. The word 'Text' is visible on the left side of the page.

| #              | Gene  | Protein ID     | Gene ID      | Strand | Feature type | Feature name      | Feature length | Chromosome | Chr start | Chr end   | Note                                  | CDD        |
|----------------|-------|----------------|--------------|--------|--------------|-------------------|----------------|------------|-----------|-----------|---------------------------------------|------------|
|                | MECP2 | NP_001104262.1 | NM_001110792 | -      | Site         | DNA binding       | 3              | chrX       | 153296880 | 153296882 | DNA binding site [nucleotide binding] | CDD:238690 |
|                | MECP2 | NP_001303266.1 | NM_001316337 | -      | Site         | DNA binding       | 3              | chrX       | 153296880 | 153296882 | DNA binding site [nucleotide binding] | CDD:238690 |
|                | MECP2 | NP_004983.1    | NM_004992    | -      | Site         | DNA binding       | 3              | chrX       | 153296880 | 153296882 | DNA binding site [nucleotide binding] | CDD:238690 |
| chr11:78285450 | NARS2 | NP_078954.4    | NM_024678    | -      | Region       | asnC              | 1344           | chr11      | 78285393  | 78285455  | asparaginyl-tRNA synthetase Validated | CDD:235176 |
| chr2:166848401 | SCN1A | NP_001159435.1 | NM_001165963 | -      | Region       | IV. [ECO:0000305] | 897            | chr2       | 166848322 | 166848932 | propagated from UniProtKB/Swiss-      |            |

Table 2: Number of variants in the groups

| Chr   | All     | Regions | Sites  | A_All   | A_Common | A_Rare  | A_ClinVar | N_All    | N_Common | N_Rare   | N_ClinVar |
|-------|---------|---------|--------|---------|----------|---------|-----------|----------|----------|----------|-----------|
| chr1  | 483643  | 474563  | 51896  | 483643  | 4238     | 479405  | 1431      | 1011316  | 13250    | 998066   | 734       |
| chr2  | 341035  | 335633  | 32648  | 341035  | 2412     | 338623  | 1591      | 737593   | 8887     | 728706   | 646       |
| chr3  | 285275  | 279878  | 32143  | 285275  | 1956     | 283319  | 957       | 555713   | 6840     | 548873   | 370       |
| chr4  | 185295  | 181604  | 19817  | 185295  | 1528     | 183767  | 450       | 378354   | 5000     | 373354   | 297       |
| chr5  | 224329  | 220643  | 23646  | 224329  | 1710     | 222619  | 688       | 425803   | 5331     | 420472   | 364       |
| chr6  | 243931  | 239567  | 28150  | 243931  | 2881     | 241050  | 646       | 489075   | 7775     | 481300   | 364       |
| chr7  | 218162  | 214360  | 26004  | 218162  | 1755     | 216407  | 800       | 519136   | 7264     | 511872   | 322       |
| chr8  | 166582  | 163881  | 16546  | 166582  | 1186     | 165396  | 440       | 371435   | 4819     | 366616   | 404       |
| chr9  | 196690  | 192983  | 19418  | 196690  | 1590     | 195100  | 703       | 425407   | 5400     | 420007   | 289       |
| chr10 | 181682  | 179084  | 15341  | 181682  | 1519     | 180163  | 490       | 402627   | 5642     | 396985   | 258       |
| chr11 | 303660  | 296116  | 45762  | 303660  | 2781     | 300879  | 1227      | 608238   | 7484     | 600754   | 635       |
| chr12 | 256844  | 252106  | 28713  | 256844  | 2086     | 254758  | 770       | 525411   | 6574     | 518837   | 337       |
| chr13 | 78567   | 77195   | 8053   | 78567   | 597      | 77970   | 663       | 174533   | 2168     | 172365   | 465       |
| chr14 | 153645  | 150797  | 16482  | 153645  | 1236     | 152409  | 448       | 351843   | 4871     | 346972   | 195       |
| chr15 | 162036  | 159527  | 14388  | 162036  | 1308     | 160728  | 609       | 371689   | 5081     | 366608   | 411       |
| chr16 | 227293  | 222200  | 24486  | 227293  | 1813     | 225480  | 959       | 513548   | 6514     | 507034   | 473       |
| chr17 | 298535  | 293384  | 33162  | 298535  | 2322     | 296213  | 1107      | 599201   | 7428     | 591773   | 861       |
| chr18 | 67997   | 66518   | 7537   | 67997   | 558      | 67439   | 230       | 154690   | 2112     | 152578   | 114       |
| chr19 | 379026  | 372784  | 49494  | 379026  | 3499     | 375527  | 873       | 682449   | 9668     | 672781   | 364       |
| chr20 | 122527  | 120529  | 11936  | 122527  | 1023     | 121504  | 282       | 252663   | 3170     | 249493   | 124       |
| chr21 | 51210   | 50616   | 3715   | 51210   | 513      | 50697   | 212       | 110728   | 1691     | 109037   | 95        |
| chr22 | 109532  | 107599  | 10567  | 109532  | 968      | 108564  | 335       | 248318   | 3583     | 244735   | 166       |
| chrX  | 112451  | 110554  | 11403  | 112451  | 761      | 111690  | 636       | 248987   | 2758     | 246229   | 308       |
| SUM   | 4849947 | 4762121 | 531307 | 4849947 | 40240    | 4809707 | 16547     | 10158757 | 133310   | 10025447 | 8596      |

Legend:

Chr – chromosome; All – number of all annotated variants; Regions – number of variants annotated into Regions; Sites – number of variants annotated into Sites; A\_Common – number of annotated polymorphism variants (with allele frequency in gnomAD > 0.01); A\_Rare – number of annotated rare variants (with allele frequency in gnomAD < 0.01); A\_ClinVar – number of annotated variants annotated as Pathogenic or Likely pathogenic in ClinVar; N\_all – number of not annotated variants; N\_Common – number of not-annotated polymorphism variants (with allele frequency in gnomAD > 0.01); A\_Rare – number of not-annotated rare variants (with allele frequency in gnomAD < 0.01); A\_ClinVar – number of not-annotated variants annotated as Pathogenic or Likely pathogenic in ClinVar;

Table 3: Results of Chi-square test of independence

Rare and common variants comparison

| <b>Regions and Sites</b>                                                                        | <b>Rare</b> | <b>Common</b> |
|-------------------------------------------------------------------------------------------------|-------------|---------------|
| Annotated                                                                                       | 4 809 707   | 40 240        |
| Not annotated                                                                                   | 10 025 447  | 133 310       |
| <b>An association was observed <math>\chi^2(1) = 6688.357</math>, <math>p &lt; 0.01</math>.</b> |             |               |
| <b>Odds ratio</b>                                                                               | <b>1,59</b> |               |

| <b>Regions</b>                                                                                  | <b>Rare</b> | <b>Common</b> |
|-------------------------------------------------------------------------------------------------|-------------|---------------|
| Annotated regions                                                                               | 4 722 630   | 39 491        |
| Not annotated                                                                                   | 10 025 447  | 133 310       |
| <b>An association was observed <math>\chi^2(1) = 6607.487</math>, <math>p &lt; 0.01</math>.</b> |             |               |
| <b>Odds ratio</b>                                                                               | <b>1,59</b> |               |

| <b>Sites</b>                                                                                   | <b>Rare</b> | <b>Common</b> |
|------------------------------------------------------------------------------------------------|-------------|---------------|
| Annotated sites                                                                                | 526 862     | 4 445         |
| Not annotated                                                                                  | 10 025 447  | 133 310       |
| <b>An association was observed <math>\chi^2(1) = 898.024</math>, <math>p &lt; 0.01</math>.</b> |             |               |
| <b>Odds ratio</b>                                                                              | <b>1,58</b> |               |

Legend:

Chi-square statistics with contingency table analysis was done. The two directions of classification (rows and columns) are dependent at  $p < 0.01$ . Odds ratio 1.59.

Table 3: Results of Chi-square test of independence (continue)

Pathogenic variants and not pathogenic variants in ClinVar comparison

| <b>Regions and Sites</b>                                                                         | <b>Clinvar</b> | <b>NOT Clinvar</b> |
|--------------------------------------------------------------------------------------------------|----------------|--------------------|
| Annotated                                                                                        | 16 547         | 4 833 400          |
| Not annotated                                                                                    | 8 596          | 10 150 161         |
| <b>An association was observed <math>\chi^2(1) = 12920.354</math>, <math>p &lt; 0.01</math>.</b> |                |                    |
| <b>Odds ratio</b>                                                                                | <b>4,04</b>    |                    |

| <b>Regions</b>                                                                                   | <b>Clinvar</b> | <b>NOT Clinvar</b> |
|--------------------------------------------------------------------------------------------------|----------------|--------------------|
| Annotated regions                                                                                | 16 334         | 4 745 787          |
| Not annotated                                                                                    | 8 596          | 10 150 161         |
| <b>An association was observed <math>\chi^2(1) = 12976.833</math>, <math>p &lt; 0.01</math>.</b> |                |                    |
| <b>Odds ratio</b>                                                                                | <b>4,06</b>    |                    |

| <b>Sites</b>                                                                                    | <b>Clinvar</b> | <b>NOT Clinvar</b> |
|-------------------------------------------------------------------------------------------------|----------------|--------------------|
| Annotated sites                                                                                 | 2 211          | 529 096            |
| Not annotated                                                                                   | 8 596          | 10 150 161         |
| <b>An association was observed <math>\chi^2(1) = 5494.876</math>, <math>p &lt; 0.01</math>.</b> |                |                    |
| <b>Odds ratio</b>                                                                               | <b>4,93</b>    |                    |

Legend:

Chi-square statistics with contingency table analysis was done. The two directions of classification (rows and columns) are dependent at  $p < 0.01$ . Odd ratio 4.04.

Table 4: Testing data / 60 causal pathogenic mutations and their annotation onto domains

| Variant                                         | Chr   | Position    | Protein ID     | Annotated domain                          |
|-------------------------------------------------|-------|-------------|----------------|-------------------------------------------|
| <b>Ion transport protein:</b>                   |       |             |                |                                           |
| HCN1_NM_021072.3 c.1189A>G p.Ile397Leu          | chr5  | 45 396 635  | NP_066550.2    | ion transport protein                     |
| KCNQ2_NM_172107.2 c.701C>T p.Thr234Ile          | chr20 | 62 073 874  | NP_004509.2    | ion transport protein                     |
| KCNQ2_NM_172107.2 c.826A>C p.Thr276Pro          | chr20 | 62 071 052  | NP_004509.2    | ion transport protein                     |
| KCNQ2_NM_172107.2 c.913_915delTTC p.Phe305del   | chr20 | 62 070 962  | NP_004509.2    | ion transport protein                     |
| SCN1A_AB093548.1.c.542A>G p.Glu181Gly           | chr2  | 166 911 208 | NP_001159435.1 | ion transport protein                     |
| SCN1A_NM_001165963.1 c.5384A>G p.Glu1795Gly     | chr2  | 166 848 401 | NP_001159435.1 | ion transport protein                     |
| SCN1A_NM_001165963.1c.1178G>A p.Arg393His       | chr2  | 166 903 479 | NP_001159435.1 | ion transport protein                     |
| SCN1A_NM_001165963.1c.4384dup p.Tyr1462Leufs*24 | chr2  | 166 854 639 | NP_001159435.1 | ion transport protein                     |
| SCN1A_NM_001202435.1c.1244T>A p.Ile415Lys       | chr2  | 166 903 413 | NP_001159435.1 | ion transport protein                     |
| SCN2A_NM_001040142.1 c.2774T>C p.Met925Thr      | chr2  | 166 201 276 | NP_001035232.1 | ion transport protein                     |
| SCN2A_NM_021007.2:c.4756C>T p.Arg1586Cys        | chr2  | 166 243 460 | NP_001035232.1 | ion transport protein                     |
| SCN8A_NM_014191.3 c.2549G>A p.Arg850Gln         | chr12 | 52 159 459  | NP_001317189.1 | ion transport protein                     |
| SCN8A_NM_014191.3 c.4921C>G p.Leu1641Val        | chr12 | 52 200 191  | NP_001317189.1 | ion transport protein                     |
| SCN8A_NM_014191.3c.4850G>T p.Arg1617Leu         | chr12 | 52 200 120  | NP_001317189.1 | ion transport protein                     |
| <b>Transmembrane region:</b>                    |       |             |                |                                           |
| GABRB3_NM_000814.5 c.841A>G p.Thr281Ala         | chr15 | 26 806 318  | NP_000805.1    | transmembrane region                      |
| GABRB3_NM_000814.5:c.863C>A p.Thr288Asn         | chr15 | 26 806 296  | NP_000805.1    | transmembrane region                      |
| GRIN1_NM_007327.3c.1643G>A p.Arg548Gln          | chr9  | 140 058 120 | NP_000823.4    | transmembrane region                      |
| KCNQ2_NM_172107.2 c.701C>T p.Thr234Ile          | chr20 | 62 073 874  | NP_742105.1    | transmembrane region                      |
| KCNQ2_NM_172107.2 c.913_915delTTC p.Phe305del   | chr20 | 62 070 962  | NP_742105.1    | transmembrane region                      |
| SLC13A5_NM_177550.3c.425C>T p.Thr142Met         | chr17 | 6 607 319   | NP_808218.1    | transmembrane region                      |
| <b>Ion channel:</b>                             |       |             |                |                                           |
| GABRB3_NM_000814.5 c.841A>G p.Thr281Ala         | chr15 | 26 806 318  | NP_000805.1    | ion-channel transmembrane region          |
| GABRB3_NM_000814.5:c.863C>A p.Thr288Asn         | chr15 | 26 806 296  | NP_000805.1    | ion-channel transmembrane region          |
| GABRG2_NM_000816.3 c.968G>A p.Arg323Gln         | chr5  | 161 576 159 | NP_000807.2    | ion-channel transmembrane region          |
| KCNQ2_NM_172107.2 c.826A>C p.Thr276Pro          | chr20 | 62 071 052  | NP_004509.2    | ion-channel transmembrane region          |
| KCNQ2_NM_172107.2 c.913_915delTTC p.Phe305del   | chr20 | 62 070 962  | NP_004509.2    | ion-channel transmembrane region          |
| <b>Cation transporter:</b>                      |       |             |                |                                           |
| GABRB3_NM_000814.5 c.841A>G p.Thr281Ala         | chr15 | 26 806 318  | NP_000805.1    | cation transporter family protein         |
| GABRB3_NM_000814.5:c.863C>A p.Thr288Asn         | chr15 | 26 806 296  | NP_000805.1    | cation transporter family protein         |
| GABRG2_NM_000816.3 c.968G>A p.Arg323Gln         | chr5  | 161 576 159 | NP_000807.2    | cation transporter family protein         |
| <b>Others:</b>                                  |       |             |                |                                           |
| ALDH7A1_NM_001182.4c.518-14_518delinsCA         | chr5  | 125 912 902 | NP_001173.2    | NAD <sup>+</sup> -dependent dehydrogenase |
| ALDH7A1_NM_001182.4c.518-14_518delinsCA         | chr5  | 125 912 902 | NP_001173.2    | nitrosylation - polypeptide binding       |
| FOLR1_NM_000802.3:c.439C>T p.Arg147Cys          | chr11 | 71 906 737  | NP_000793.1    | folate receptor                           |
| GRIN1_NM_007327.3c.1643G>A p.Arg548Gln          | chr9  | 140 058 120 | NP_000823.4    | ligand-gated ion channel                  |
| GRIN1_NM_007327.3c.2443G>A p.Gly815Arg          | chr9  | 140 056 634 | NP_000823.4    | ligand-binding domain                     |
| GRIN2A_NM_000833.4:c.593G>A p.Trp198*           | chr16 | 10 032 230  | NP_000824.1    | LIVBP like domain                         |
| HUWE1:c.12195 G>C p.Trp4065Cys                  | chrX  | 53 563 571  | NP_113584.3    | HECT domain                               |
| HUWE1:c.12195 G>C p.Trp4065Cys                  | chrX  | 53 563 571  | NP_113584.3    | HECT domain                               |
| IQSEC2NM_001111125.2 c.3206G>C p.Arg1069Pro     | chrX  | 53 267 398  | NP_001104595.1 | PH domain                                 |
| KCNJ10_NM_002241.4:c.313C>T p.His105Tyr         | chr1  | 160 012 010 | NP_002232.2    | potassium channel - inward rectifier      |
| MECP2_NM_001110792.1:c.433C>T p.Arg145Cys       | chrX  | 153 296 882 | NP_001104262.1 | Methyl-CpG binding domain                 |
| MECP2_NM_001110792.1:c.433C>T p.Arg145Cys       | chrX  | 153 296 882 | NP_001104262.1 | DNA binding                               |
| MECP2_NM_004992.3 c.925C>T p.Arg309Trp          | chrX  | 153 296 354 | NP_004983.1    | NCOR2 interaction                         |
| MEF2C_NM_002397.4 c.766C>T p.Arg256*            | chr5  | 88 027 590  | NP_001180277.1 | MADS box-containing tr.factors            |
| NARS2:c.83_84del p.Leu28Glnfs*17                | chr11 | 78 285 450  | NP_078954.4    | asparaginyl-tRNA synthetase               |
| PCDH19_NM_001184880.1c.698A>G p.Asp233Gly       | chrX  | 99 662 898  | NP_001098713.1 | tandem repeat domain                      |
| PCDH19_NM_001184880.1c.698A>Gp.Asp233Gly        | chrX  | 99 662 898  | NP_001098713.1 | nitrosylation - ion binding               |
| PPP2R5D:c.1267_1270delCTCT p.Leu423fs           | chr6  | 42 977 075  | NP_001257405.1 | protein phosphatase                       |
| PURA_NM_005859.4 c.812_814del p.Phe271del       | chr5  | 139 494 575 | NP_005850.1    | PurA ssDNA and RNA-binding prote          |
| PURA_NM_005859.4 c.812_814del p.Phe271del       | chr5  | 139 494 575 | NP_005850.1    | DNA/RNA binding repeat                    |
| SLC13A5_NM_177550.3c.425C>T p.Thr142Met         | chr17 | 6 607 319   | NP_001137310.1 | Di- and tricarboxylate transporter        |
| SLC13A5_NM_177550.3c.425C>T p.Thr142Met         | chr17 | 6 607 319   | NP_001137310.1 | Anion permease ArsB/NhaD.                 |
| SLC25A22_NM_001191060.1:c.347G>A p.Cys116Tyr    | chr11 | 792 935     | NP_001177989.1 | mitochondrial carrier protein             |
| SLC25A22_NM_001191060.1:c.347G>A p.Cys116Tyr    | chr11 | 792 935     | NP_001177989.1 | Solcar2                                   |
| SLC25A22_NM_001191060.1:c.347G>A p.Cys116Tyr    | chr11 | 792 935     | NP_001177989.1 | ADP/ATP transporter                       |
| SLC25A22_NM_001191060.1:c.524G>T p.Arg175Leu    | chr11 | 792 616     | NP_001177989.1 | mitochondrial carrier protein             |
| SLC25A22_NM_001191060.1:c.524G>T p.Arg175Leu    | chr11 | 792 616     | NP_001177989.1 | Solcar2                                   |
| SLC25A22_NM_001191060.1:c.524G>T p.Arg175Leu    | chr11 | 792 616     | NP_001177989.1 | ADP/ATP transporter                       |
| STXBP1_NM_003165.3c.1654T>C p.Cys552Arg         | chr9  | 130 444 791 | NP_001027392.1 | Sec1 family                               |
| TREX1_NM_016381.3c.10621072del p.Leu354Phefs*22 | chr3  | 48 508 951  | NP_057465.1    | ER localization                           |
| TREX1_NM_016381.3c.1072A>C p.Thr358Pro          | chr3  | 48 508 961  | NP_057465.1    | ER localization                           |
| UBTF:c.628 G>A p.Glu210Lys                      | chr17 | 42 290 219  | NP_055048.1    | HMG-UBF_HMG-box                           |
| WDR45_NM_007075.3 c.511C>T p.Gln171*            | chrX  | 48 933 533  | NP_001025067.1 | WD40 repeat domain                        |
| WDR45_NM_007075.3 c.654del p.Arg219Alafs*69     | chrX  | 48 933 277  | NP_001025067.1 | WD40 repeat domain                        |
| WDR45_NM_007075.3 c.970_971del p.Val324Hisfs*17 | chrX  | 48 932 799  | NP_001025067.1 | WD7 repeat domain                         |
